# Supplementary material for: Transparent Cross-Flow Platform as Chemiluminescence Detection Cell in Cross Injection Analysis
Source: Molecules. 2023 Jan 30;28(3):1316. doi: 10.3390/molecules28031316 (PMC9919639; doi:10.3390/molecules28031316)
Supplement: Supplementary file 1 [file molecules-28-01316-s001.zip › molecules-2101645-supplementary.pdf]

# Transparent Cross-Flow Platform as Chemiluminescence Detection Cell in Cross Injection Analysis

Thachkorn Somboonsuk<sup>1,2</sup>, Phoonthawee Saetear<sup>1,2</sup>, Thitirat Mantim<sup>1,3</sup>, Nuanlaor Ratanawimarnwong<sup>1,3</sup>, Prapin Wilairat<sup>1,2</sup>, Nathawut Choengchan<sup>1,4,\*</sup> and Duangjai Nacapricha<sup>1,2,\*</sup>

<sup>1</sup> Flow Innovation-Research for Science and Technology Laboratories (Firstlabs), Ratchathewi District, Bangkok 10110, Thailand

<sup>2</sup> Department of Chemistry and Center of Excellence for Innovation in Chemistry, Faculty of Science, Mahidol University, Rama 6 Road, Ratchathewi District, Bangkok 10400, Thailand

<sup>3</sup> Department of Chemistry, Faculty of Science, Srinakharinwirot University, Sukhumvit 23, Watthana District, Bangkok 10110, Thailand

<sup>4</sup> Department of Chemistry and the Applied Analytical Chemistry Research Unit, Faculty of Science, King Mongkut's Institute of Technology Ladkrabang, Ladkrabang District, Bangkok 10520, Thailand

\* Correspondence: nchoengchan@gmail.com or nathawut.ch@kmitl.ac.th (N.C.); dnacapricha@gmail.com or duangjai.nac@mahidol.ac.th (D.N.); Fax: +66-23298428 (N.C.); +66-22015127 (D.N.)

This Supplementary information contains seven figures (Figures S1 to S7) and two tables (Tables S1 to S2)

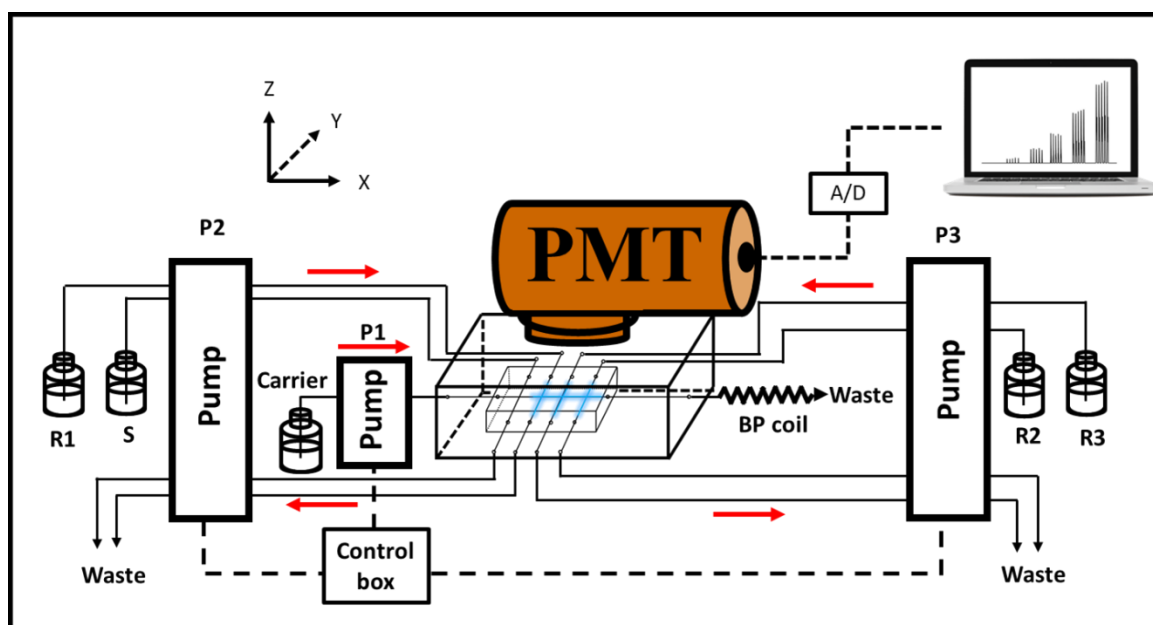

**Figure S1.** CIA System I for the determination of Co(II). P1, P2, P3 are peristaltic pumps. BP coil: PTFE tube (0.75 mm. i.d., 1,000 mm). A/D: analog to digital converter. C: carrier solution (0.5% (w/w)  $\text{H}_2\text{O}_2$  in 0.1 mol  $\text{L}^{-1}$  carbonate buffer pH 10.5. S: standard Co(II) or sample. R1: 2.5 mmol  $\text{L}^{-1}$  luminol in 0.05 mol  $\text{L}^{-1}$  NaOH. R2 and R3 are the same solution as the carrier.

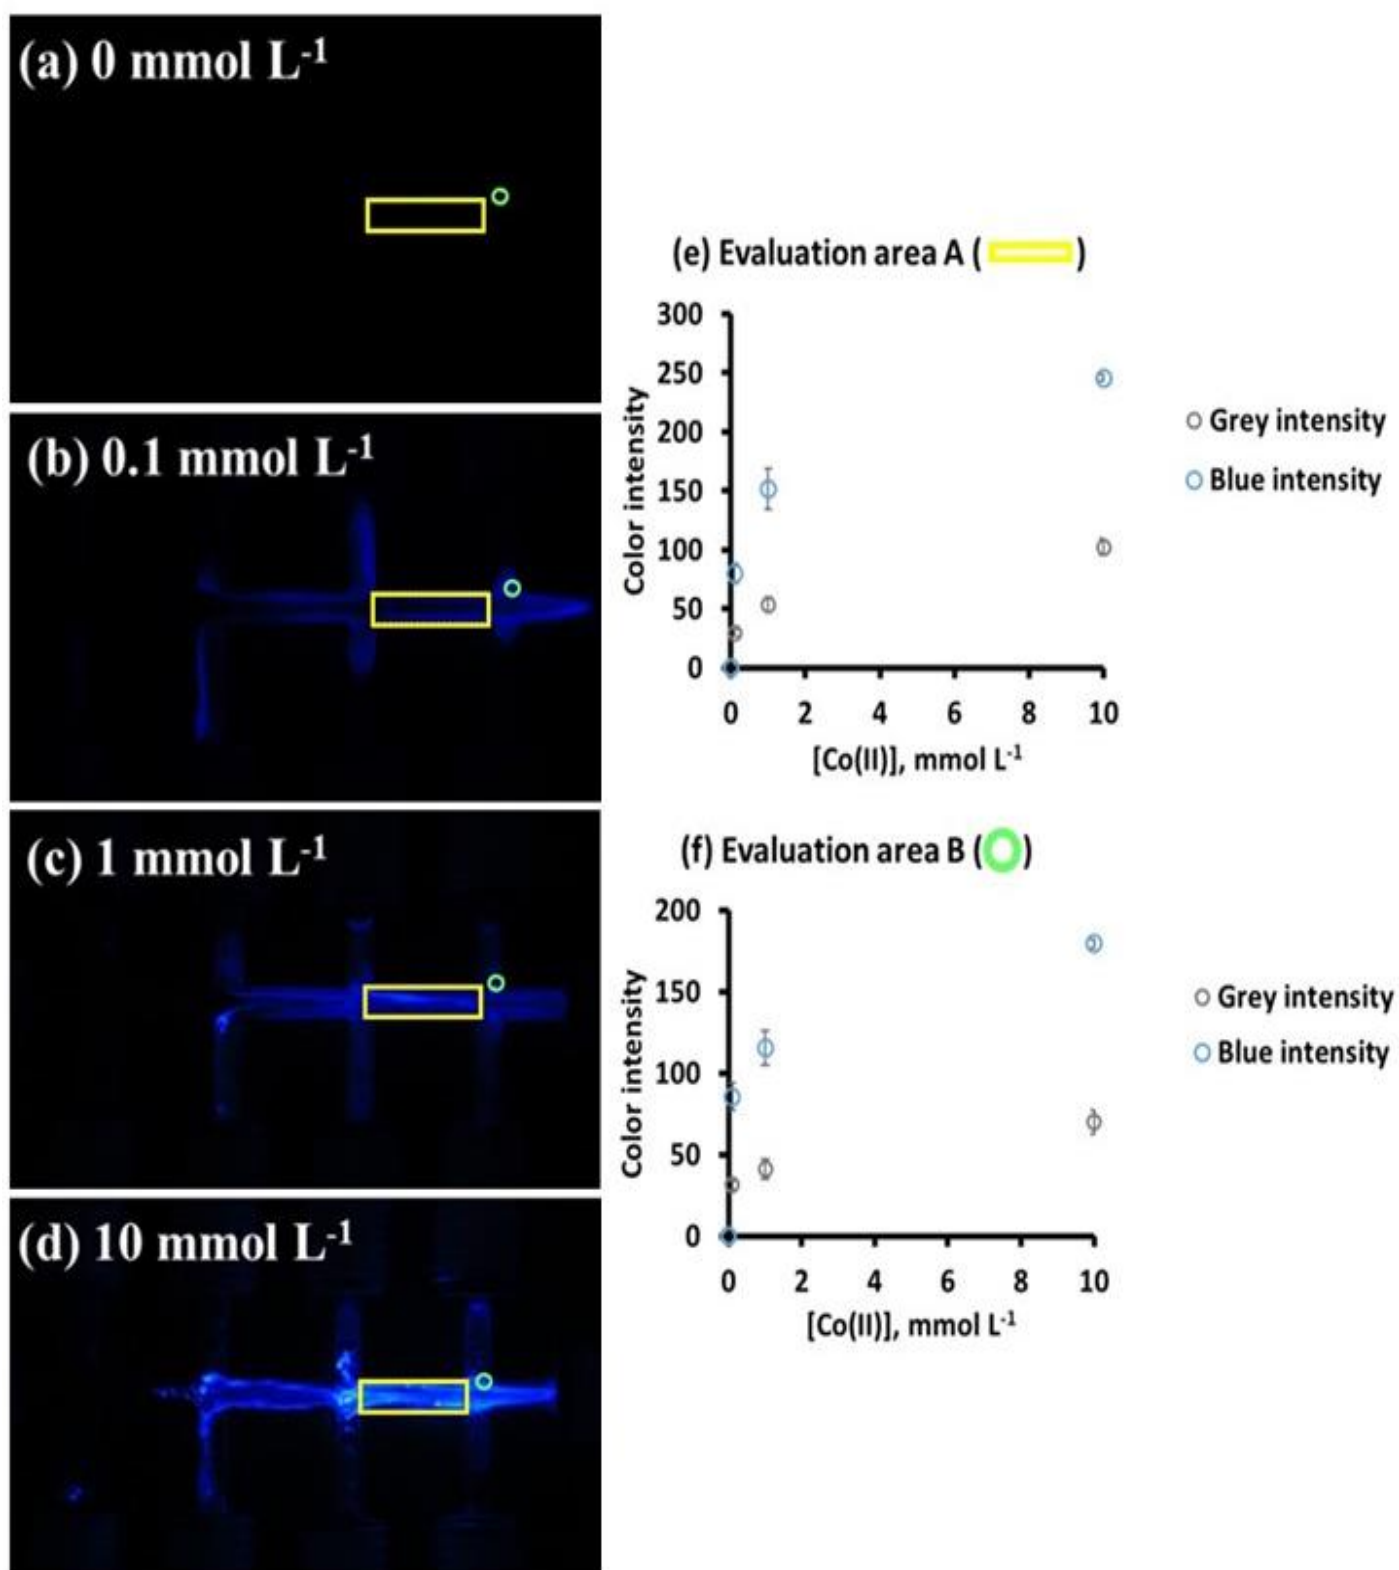

**Figure S2.** Digital images of the CIA conduit taken at 10 s after aspirating a solution containing Co(II) at 0 to 10 mmol L<sup>-1</sup> ((a) to (d), respectively) into the CIA manifold in Figure S1, together with the plot of mean Grey and Blue intensity (from ImageJ program) and concentration of Co(II). Note: The color intensity is measured at two different areas of the conduit: (e) area A and (f) area B, respectively.

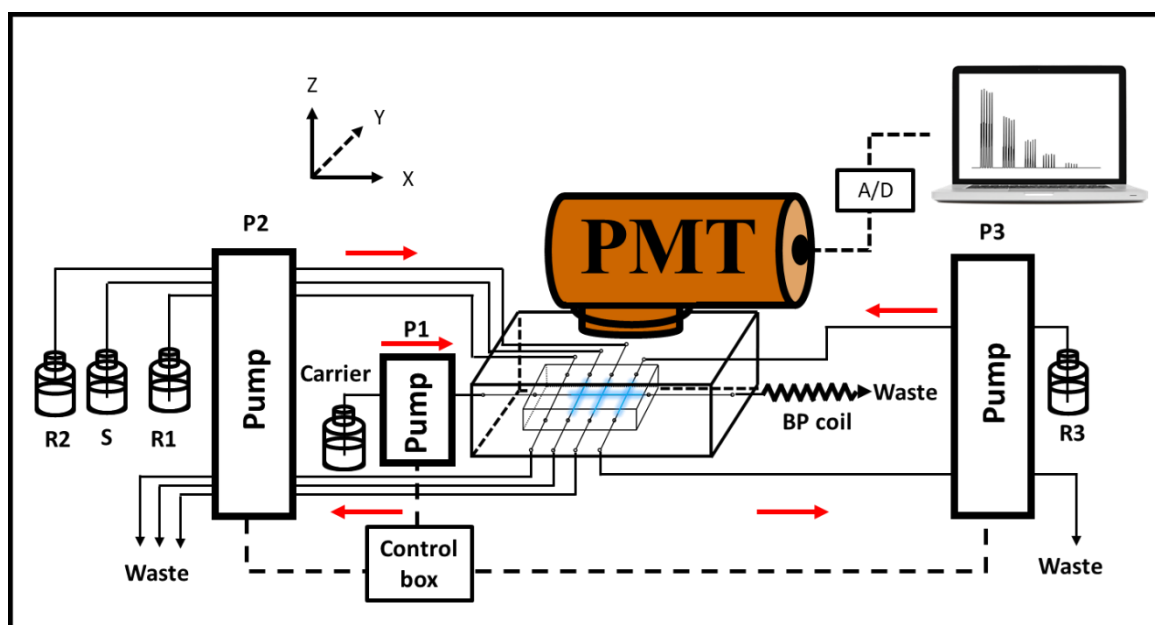

**Figure S3.** CIA System II for the determination of paracetamol. P1, P2, P3 are peristaltic pumps. BP coil: PTFE tube (0.75 mm. i.d., 1,000 mm). A/D: analog to digital converter. C: carrier solution (1.0 % (*w/w*))  $\text{H}_2\text{O}_2$  in  $0.05 \text{ mol L}^{-1}$  phosphate buffer pH 11.5. S: standard paracetamol or sample. R1:  $3 \text{ mmol L}^{-1}$  luminol in  $0.05 \text{ mol L}^{-1}$  phosphate buffer pH 11.5. R2:  $2.5 \text{ mmol L}^{-1} \text{Fe}(\text{CN})_6^{3-}$  in  $0.05 \text{ mol L}^{-1}$  phosphate buffer pH 11.5. R3 is the same solution as the carrier.

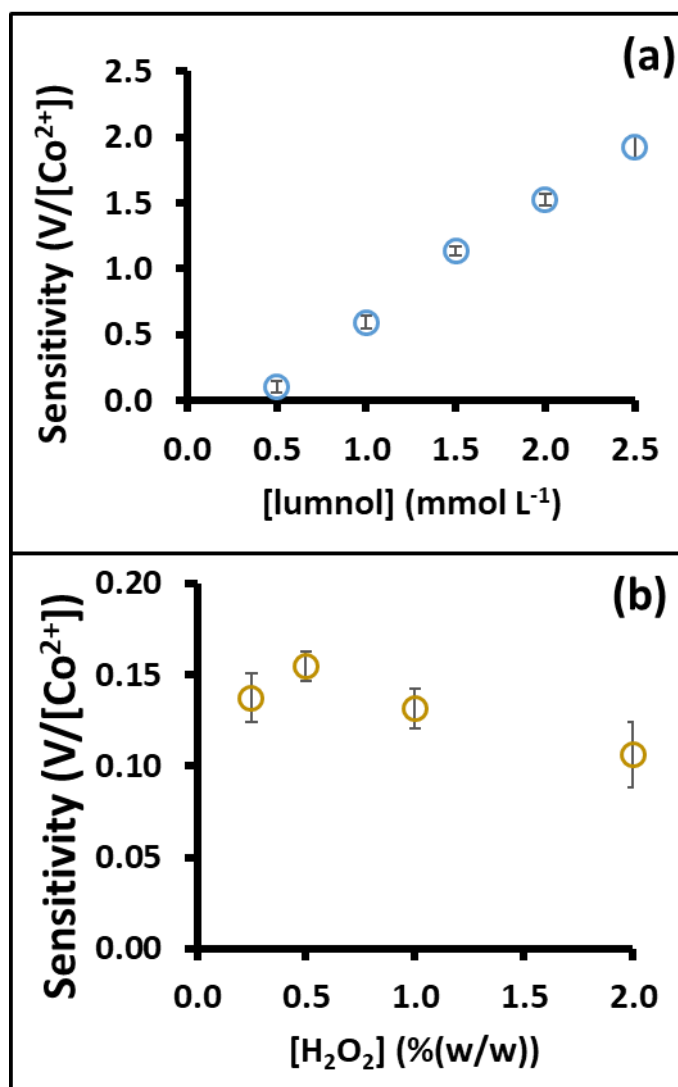

**Figure S4.** Optimization data of the CIA System I (see Figure. S1) for the determination of Co(II): (a) plot of sensitivity vs concentration of luminol in R1, (b) plot of sensitivity vs concentration of  $H_2O_2$  (in C, R2 and R3).

(a)

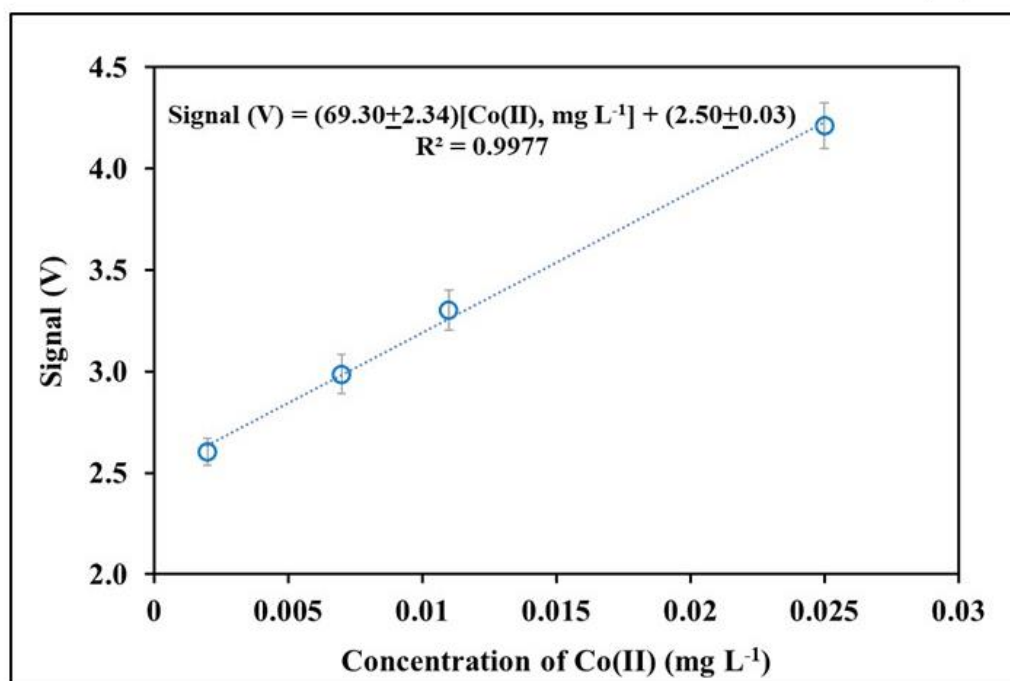

(b)

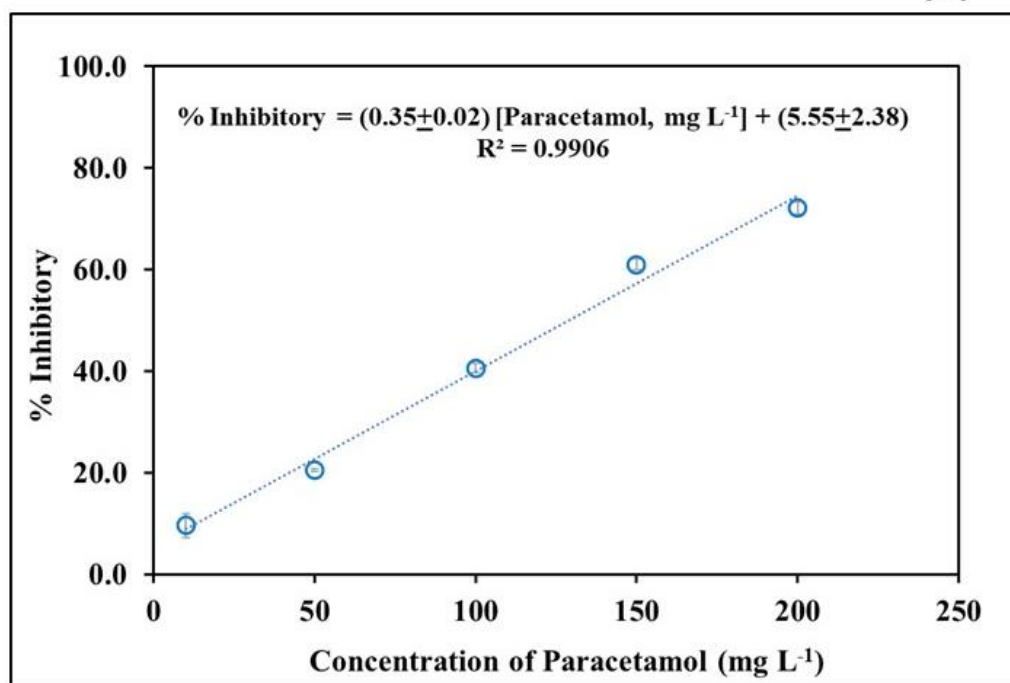

**Figure S5.** Examples of calibration curves of standard solutions of (a) Co(II) (0.5 to 3.5 mg L<sup>-1</sup>) and (b) paracetamol (10 to 200 mg L<sup>-1</sup>) with their corresponded linear calibration equations.

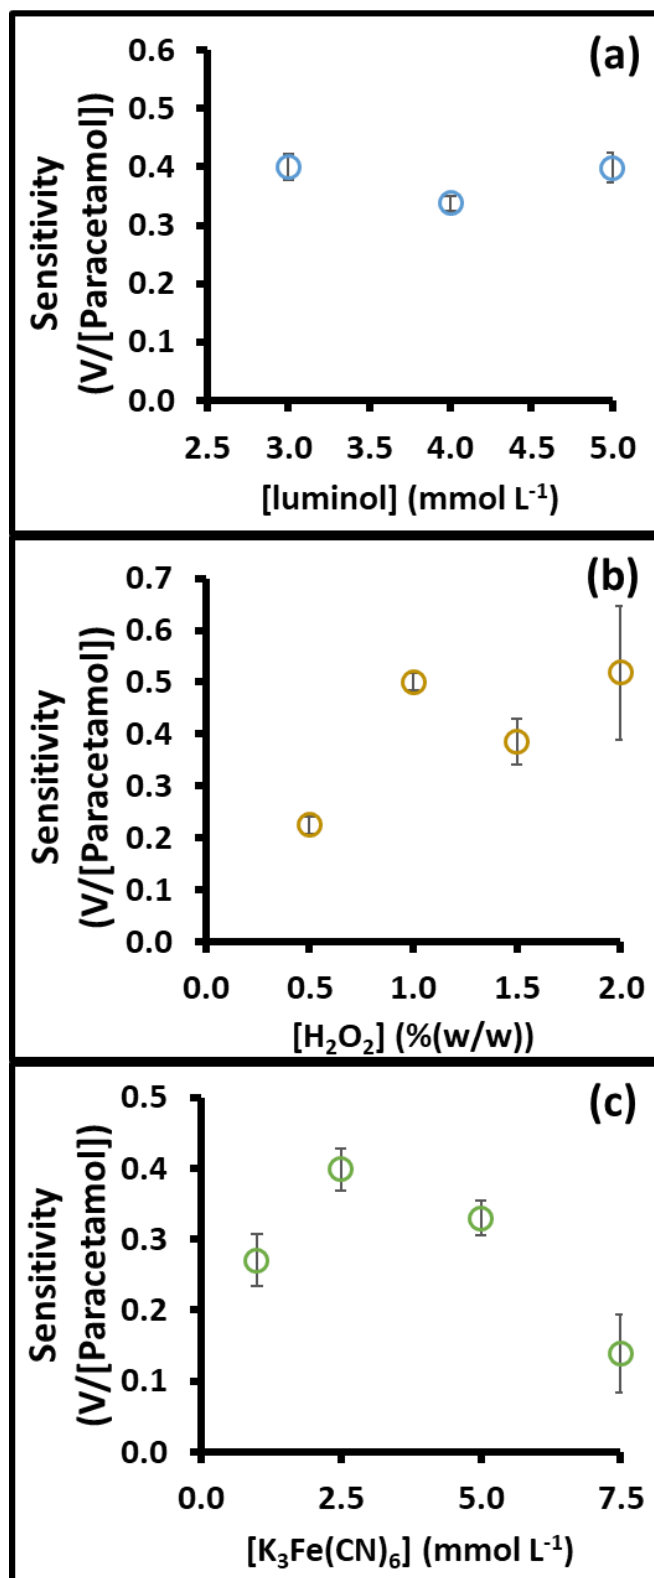

**Figure S6.** Optimization data of the CIA System II (see Figure S3) for the determination of paracetamol: (a) sensitivity vs concentration of luminol in R3, (b) sensitivity vs concentration of H<sub>2</sub>O<sub>2</sub> (in C and R3), and (c) sensitivity vs concentration of K<sub>3</sub>Fe(CN)<sub>6</sub> in R1.

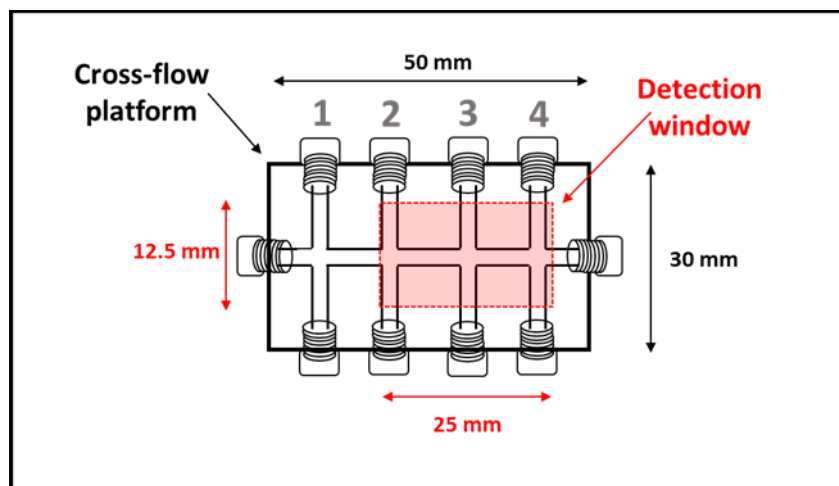

**Figure S7.** Dimensions of the CIA platform and the approximate detection area by the PMT of the conduits (y-channels No. 2 to No. 4 and the crossing areas).

**Table S1.** Operation step for “startup procedure” and “routine procedure” employed for CIA system I in Figure S1 for quantitative chemiluminescence analysis of cobalt (II).

| Operational Step                                                                                  | P1<br>(x-Axis Channel) | P2<br>(y-Axis Channels 1 and 2) | P3<br>(y-Axis Channels 3 and 4) | Duration Time<br>(s) |
|---------------------------------------------------------------------------------------------------|------------------------|---------------------------------|---------------------------------|----------------------|
| <i>Startup Procedure</i>                                                                          |                        |                                 |                                 |                      |
| 1. Filling the conduit with all solutions using x- and y- directional flows                       | On                     | On                              | On                              | 30                   |
| 2. Loading of the H <sub>2</sub> O <sub>2</sub> buffer solution ( <i>via</i> C, R2 and R3)        | On                     | Off                             | On                              | 30                   |
| 3. Loading of sample, luminol solution (R1) and H <sub>2</sub> O <sub>2</sub> buffer solution (C) | On                     | On                              | Off                             | 10                   |
| 4. Mixing using x-directional flow                                                                | On                     | Off                             | Off                             | 20                   |
| 5. Rinsing with H <sub>2</sub> O <sub>2</sub> buffer solution ( <i>via</i> C, R2 and R3)          | On                     | Off                             | On                              | 30                   |
| <i>Routine procedure</i>                                                                          |                        |                                 |                                 |                      |
| 1. Loading of sample, luminol solution (R1) and H <sub>2</sub> O <sub>2</sub> buffer solution (C) | On                     | On                              | Off                             | 10                   |
| 2. Mixing using x-directional flow                                                                | On                     | Off                             | Off                             | 20                   |
| 3. Rinsing with H <sub>2</sub> O <sub>2</sub> buffer solution ( <i>via</i> C, R2 and R3)          | On                     | Off                             | On                              | 30                   |

**Table S2.** Operation step for “startup procedure” and “routine procedure” employed for CIA system II in Figure S3 for quantitative chemiluminescence analysis of paracetamol.

| Operational Step                                                                                                                                       | P1<br>(x-Axis Channel) | P2<br>(y-Axis Channels 1, 2 and 3) | P3<br>(y-Axis Channels 4) | Duration Time<br>(s) |
|--------------------------------------------------------------------------------------------------------------------------------------------------------|------------------------|------------------------------------|---------------------------|----------------------|
| <i>Startup Procedure</i>                                                                                                                               |                        |                                    |                           |                      |
| 1. Filling the conduit with all solutions using x- and y- directional flows                                                                            | On                     | On                                 | On                        | 30                   |
| 2. Loading of the H <sub>2</sub> O <sub>2</sub> buffer solution (via C and R3)                                                                         | On                     | Off                                | On                        | 30                   |
| 3. Loading of sample, Fe(CN) <sub>6</sub> <sup>3-</sup> solution (R1), luminol solution (R2) and H <sub>2</sub> O <sub>2</sub> buffer solution (via C) | On                     | On                                 | Off                       | 10                   |
| 4. Mixing using x-directional flow                                                                                                                     | On                     | Off                                | Off                       | 30                   |
| 5. Rinsing with H <sub>2</sub> O <sub>2</sub> buffer solution (via C and R3)                                                                           | On                     | Off                                | On                        | 20                   |
| <i>Routine Procedure</i>                                                                                                                               |                        |                                    |                           |                      |
| 1. Loading of sample, Fe(CN) <sub>6</sub> <sup>3-</sup> solution (R1), luminol solution (R2) and H <sub>2</sub> O <sub>2</sub> buffer solution (via C) | On                     | On                                 | Off                       | 10                   |
| 2. Mixing using x-directional flow                                                                                                                     | On                     | Off                                | Off                       | 30                   |
| 3. Rinsing with H <sub>2</sub> O <sub>2</sub> buffer solution (via C and R3)                                                                           | On                     | Off                                | On                        | 20                   |
